# Supplementary material for: Human PRPF39 is an alternative splicing factor recruiting U1 snRNP to weak 5′ splice sites
Source: PubMed Central journal article supplement — RNA. 2023 Jan;29(1):97–110. doi: 10.1261/rna.079320.122 (PMC9808567; doi:10.1261/rna.079320.122), 2023-01
Supplement: supp_079320.122_Supplemental_Figure_S1.pdf [file supp_079320.122_Supplemental_Figure_S1.pdf]

Fig. S1

A

|             |    |     |     |     |     |      |      |      |      |      |
|-------------|----|-----|-----|-----|-----|------|------|------|------|------|
| PRPF39 (nM) | -  | 270 | 270 | 617 | 964 | 1311 | 1658 | 2005 | 2352 | 2700 |
| GC (nM)     | 10 | -   | 10  | 10  | 10  | 10   | 10   | 10   | 10   | 10   |

|             |    |     |     |     |     |      |      |      |      |      |
|-------------|----|-----|-----|-----|-----|------|------|------|------|------|
| PRPF39 (nM) | -  | 270 | 270 | 617 | 964 | 1311 | 1658 | 2005 | 2352 | 2700 |
| GC (nM)     | 10 | -   | 10  | 10  | 10  | 10   | 10   | 10   | 10   | 10   |

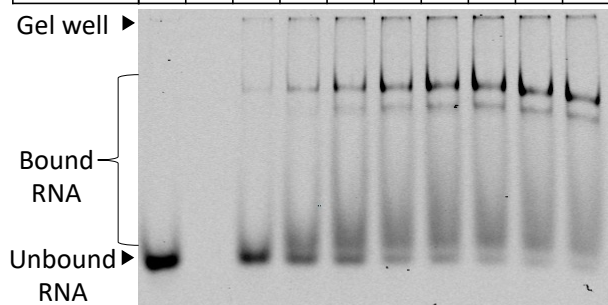

EMSA  
IRDye-labeled RNA (GGCCCCCGG)

PRPF39-RNA (band 1)  
RNA released from complex (band 2)  
RNA released from complex (band 3)  
Unbound RNA (band 4)

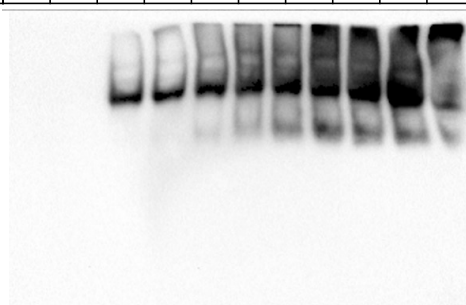

Western Blot  
anti-PRPF39

B

|              |   |     |     |     |     |     |     |    |    |    |
|--------------|---|-----|-----|-----|-----|-----|-----|----|----|----|
| Proteinase K | - | -   | -   | +   | -   | -   | +   | -  | -  | +  |
| PRPF39       | - | NTD | NTD | NTD | CTD | CTD | CTD | FL | FL | FL |
| GC RNA oligo | + | -   | +   | +   | -   | +   | +   | -  | +  | +  |

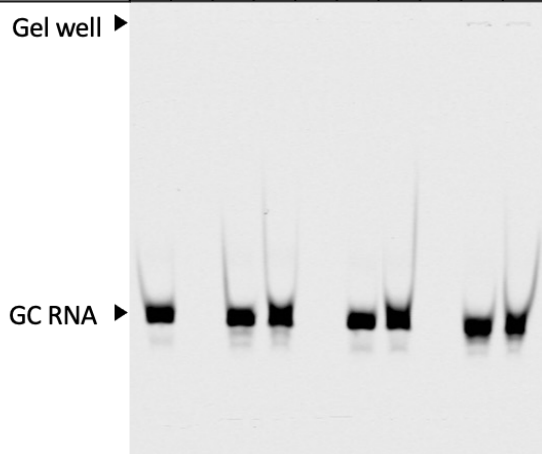

GC RNA
