# Supplementary figures and images for: Human PRPF39 is an alternative splicing factor recruiting U1 snRNP to weak 5′ splice sites
Source: PubMed Central journal article supplement — RNA. 2023 Jan;29(1):97–110. doi: 10.1261/rna.079320.122 (PMC9808567; doi:10.1261/rna.079320.122), 2023-01

Fig. S2

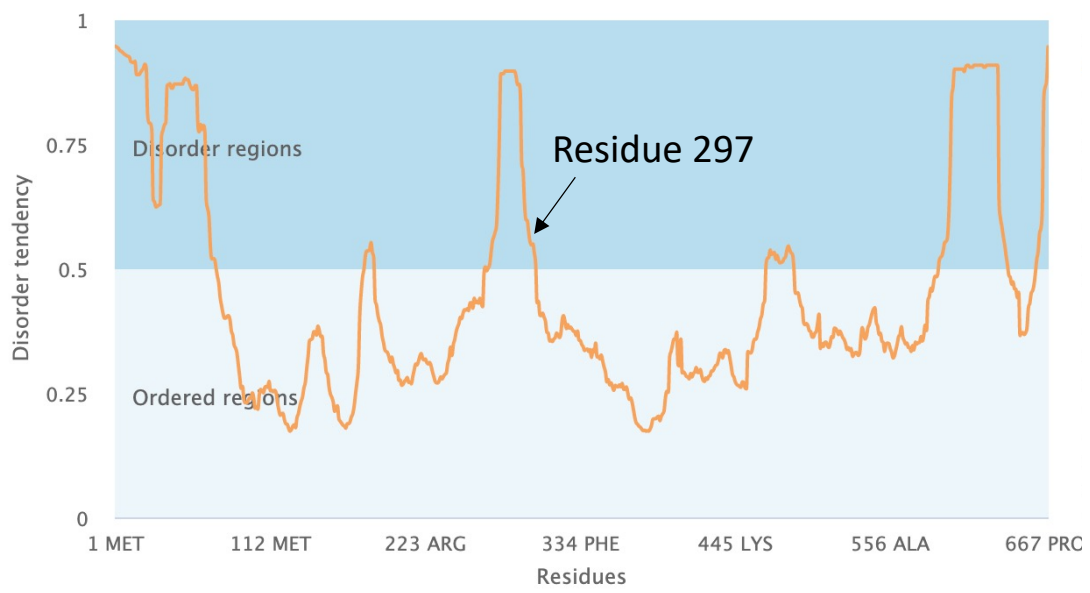

Supplement: supp_079320.122_Supplemental_Figure_S2.pdf [file supp_079320.122_Supplemental_Figure_S2.pdf]

Fig. S3

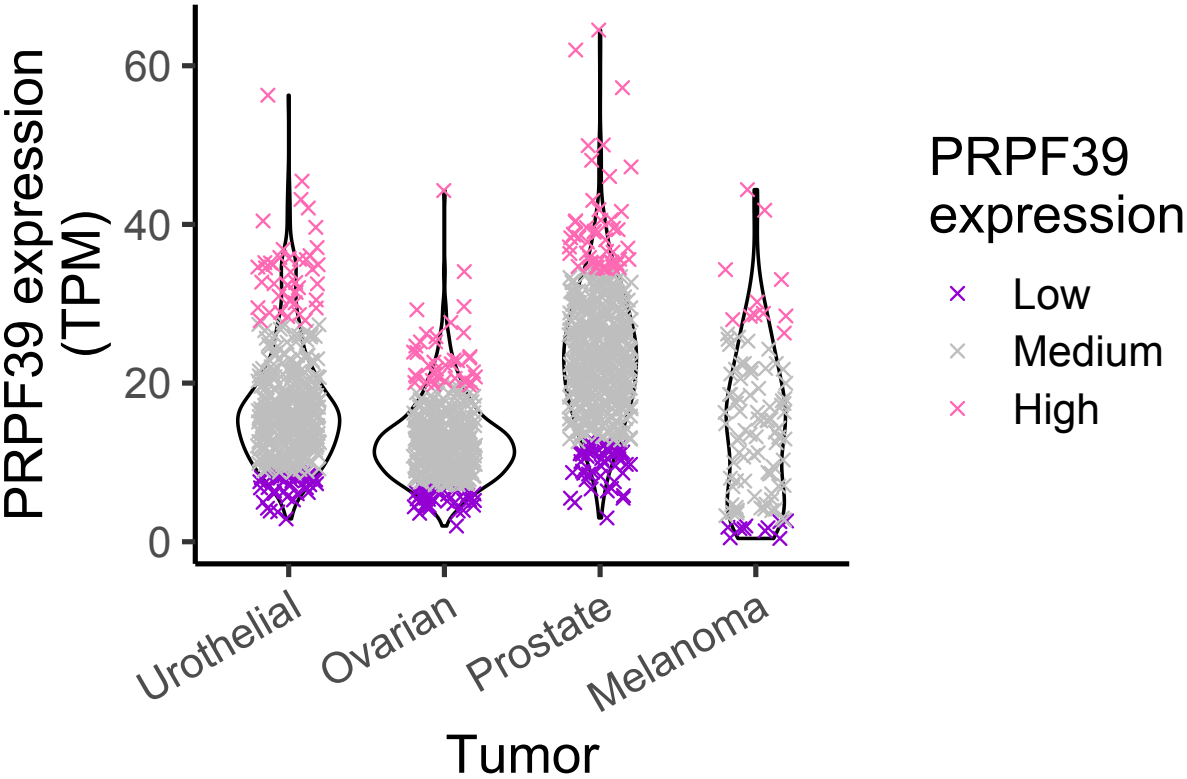

Supplement: supp_079320.122_Supplemental_Figure_S3.pdf [file supp_079320.122_Supplemental_Figure_S3.pdf]
